# Supplementary material for: Activin-A impedes the establishment of CD4+ T cell exhaustion and enhances anti-tumor immunity in the lung
Source: PubMed Central journal article supplement (PMC8454162; doi:10.1186/s13046-021-02092-5), 2021-09-21
Supplement: 13046_2021_2092_MOESM1_ESM.pdf [file 13046_2021_2092_MOESM1_ESM.pdf]

Supplementary material for:

**Activin-A impedes the establishment of CD4<sup>+</sup> T cell exhaustion and enhances anti-tumor immunity in the lung**

Ioannis Morianos<sup>1</sup>, Aikaterini Tsitsopoulou<sup>1</sup>, Konstantinos Potaris<sup>2</sup>, Dimitrios Valakos<sup>3</sup>, Ourania Fari<sup>1†</sup>, Giannis Vatsellas<sup>4</sup>, Clementine Bostantzoglou<sup>5</sup>, Andreas Photiades<sup>6</sup>, Mina Gaga<sup>6</sup>, Georgina Xanthou<sup>1</sup> and Maria Semitekolou<sup>1\*</sup>

<sup>1</sup>Cellular Immunology Laboratory, Biomedical Research Foundation of the Academy of Athens (BRFAA), Athens, 11527, Greece; <sup>2</sup>Department of Thoracic Surgery, Athens Chest Hospital 'Sotiria', Athens, 11527, Greece; <sup>3</sup>Molecular Biology Laboratory, BRFAA, Athens, 11527, Greece; <sup>4</sup>Greek Genome Center, BRFAA, Athens, 11527, Greece; <sup>5</sup>Intensive Care Unit, Athens Chest Hospital 'Sotiria', Athens, 11527, Greece; <sup>6</sup>7th Respiratory Medicine Department and Asthma Center, Athens Chest Hospital 'Sotiria', Athens, 11527, Greece.

<sup>†</sup>Current address: Institute of Cancer Research, Department of Medicine I, Comprehensive Cancer Center, Medical University of Vienna, Vienna, 1090, Austria.

\*Corresponding author:

Maria Semitekolou, PhD

Cellular Immunology Laboratory,

Biomedical Research Foundation of the Academy of Athens,

Athens 115 27 Greece

Tel: +30-210-6597 336

Email: [msemi@bioacademy.gr](mailto:msemi@bioacademy.gr)

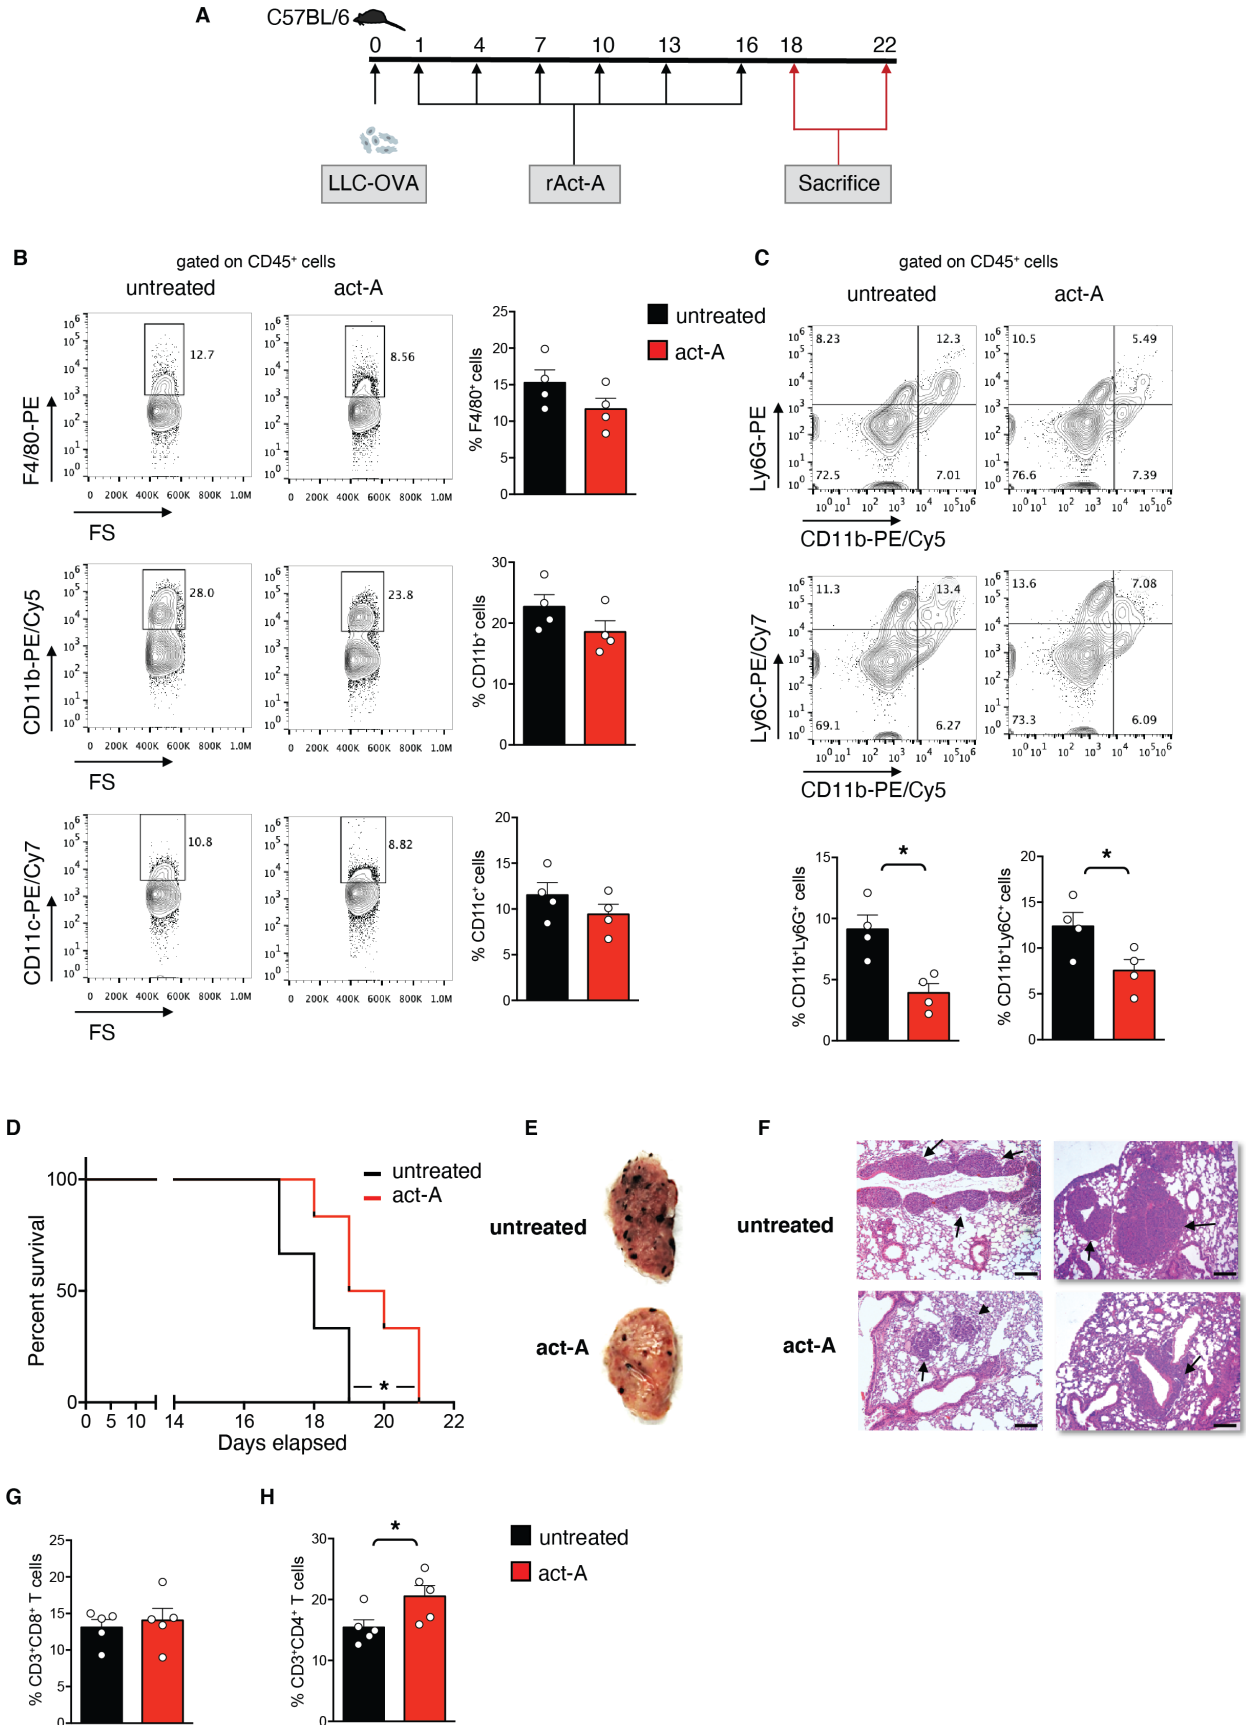

**Supplemental figure 1. *In vivo* administration of activin-A attenuates the development and progression of melanoma lung metastases.**

(A) Experimental protocol utilized. (B) Representative flow cytometry plots (left) and cumulative percentages of F4/80<sup>+</sup> macrophages, CD11b<sup>+</sup> myeloid and CD11c<sup>+</sup> dendritic cells among CD45<sup>+</sup> lung tumor infiltrating cells (right). (C) Representative flow cytometry plots (left) and cumulative percentages of CD11b<sup>+</sup>Ly6G<sup>+</sup> granulocytic and CD11b<sup>+</sup>Ly6C<sup>+</sup> monocytic myeloid derived suppressor cells among CD45<sup>+</sup> lung tumor infiltrating cells (right). (D) Survival plot of activin-A-treated or untreated B16F10-tumor bearing mice ( $n=6$ ). (E) Representative macroscopic images of B16F10-tumor bearing lung lobes. (F) Representative photomicrographs of H&E-stained lung sections (scale bars: 100 $\mu$ m). (G) Cumulative percentages of CD3<sup>+</sup>CD8<sup>+</sup> T cells among CD45<sup>+</sup> lung tumor infiltrating cells. (H) Cumulative percentages of CD3<sup>+</sup>CD4<sup>+</sup> T cells among CD45<sup>+</sup> lung tumor infiltrating cells. Data are representative of 4-5 independent experiments. Statistical significance was obtained by Log-rank (Mantel-Cox) test and unpaired Student's t-test; \*P < 0.05.

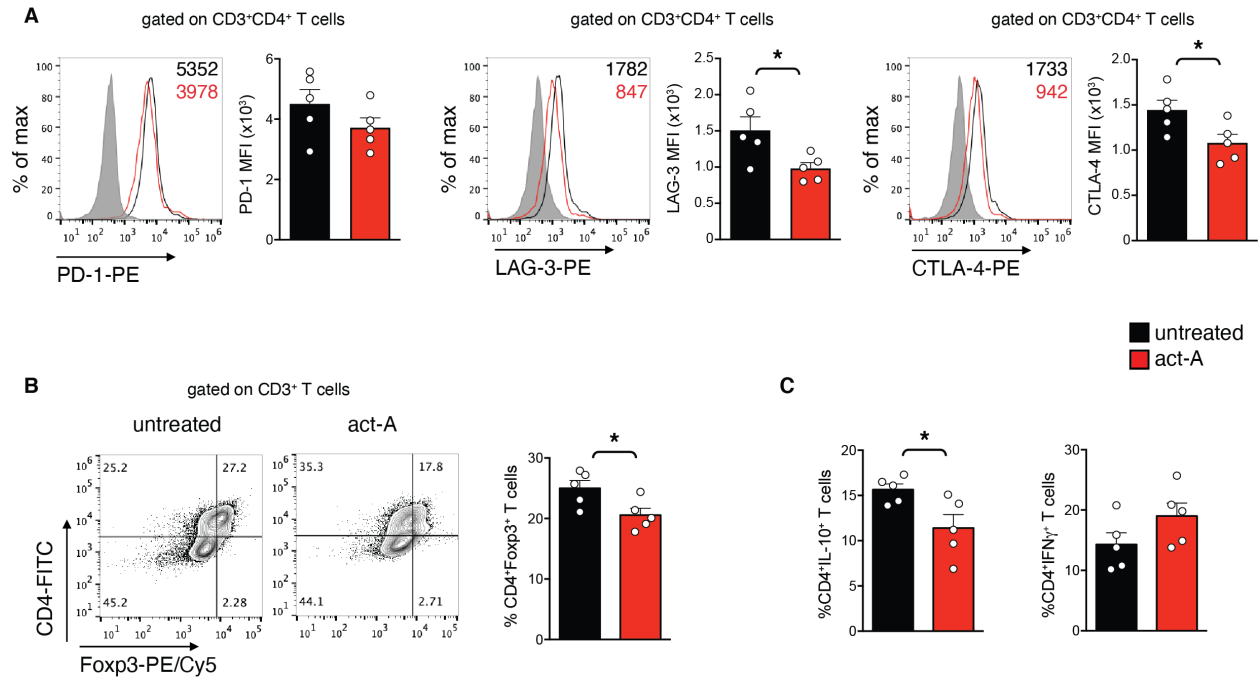

**Supplemental figure 2. Activin-A represses the expression of inhibitory receptors on melanoma lung metastases-infiltrating CD4<sup>+</sup> T cells.**

(A) Representative flow cytometry plots (left) and cumulative MFI values of PD-1, LAG-3 or CTLA-4 expression by CD3<sup>+</sup>CD4<sup>+</sup> T cells infiltrating lung tumors (right) from activin-A-treated or untreated B16F10-tumor bearing mice. Numbers in plots indicate MFI values. Shaded histograms represent isotype controls. (B) Representative flow cytometry plots (left) and cumulative percentages of Foxp3-expressing cells among CD3<sup>+</sup>CD4<sup>+</sup> T cells infiltrating lung tumors (right). (C) Cumulative percentages of IL-10- or IFN-γ-expressing cells among CD3<sup>+</sup>CD4<sup>+</sup> T cells infiltrating lung tumors. Data are representative of 5 independent experiments. Statistical significance was obtained by unpaired Student's t-test; \*P < 0.05.

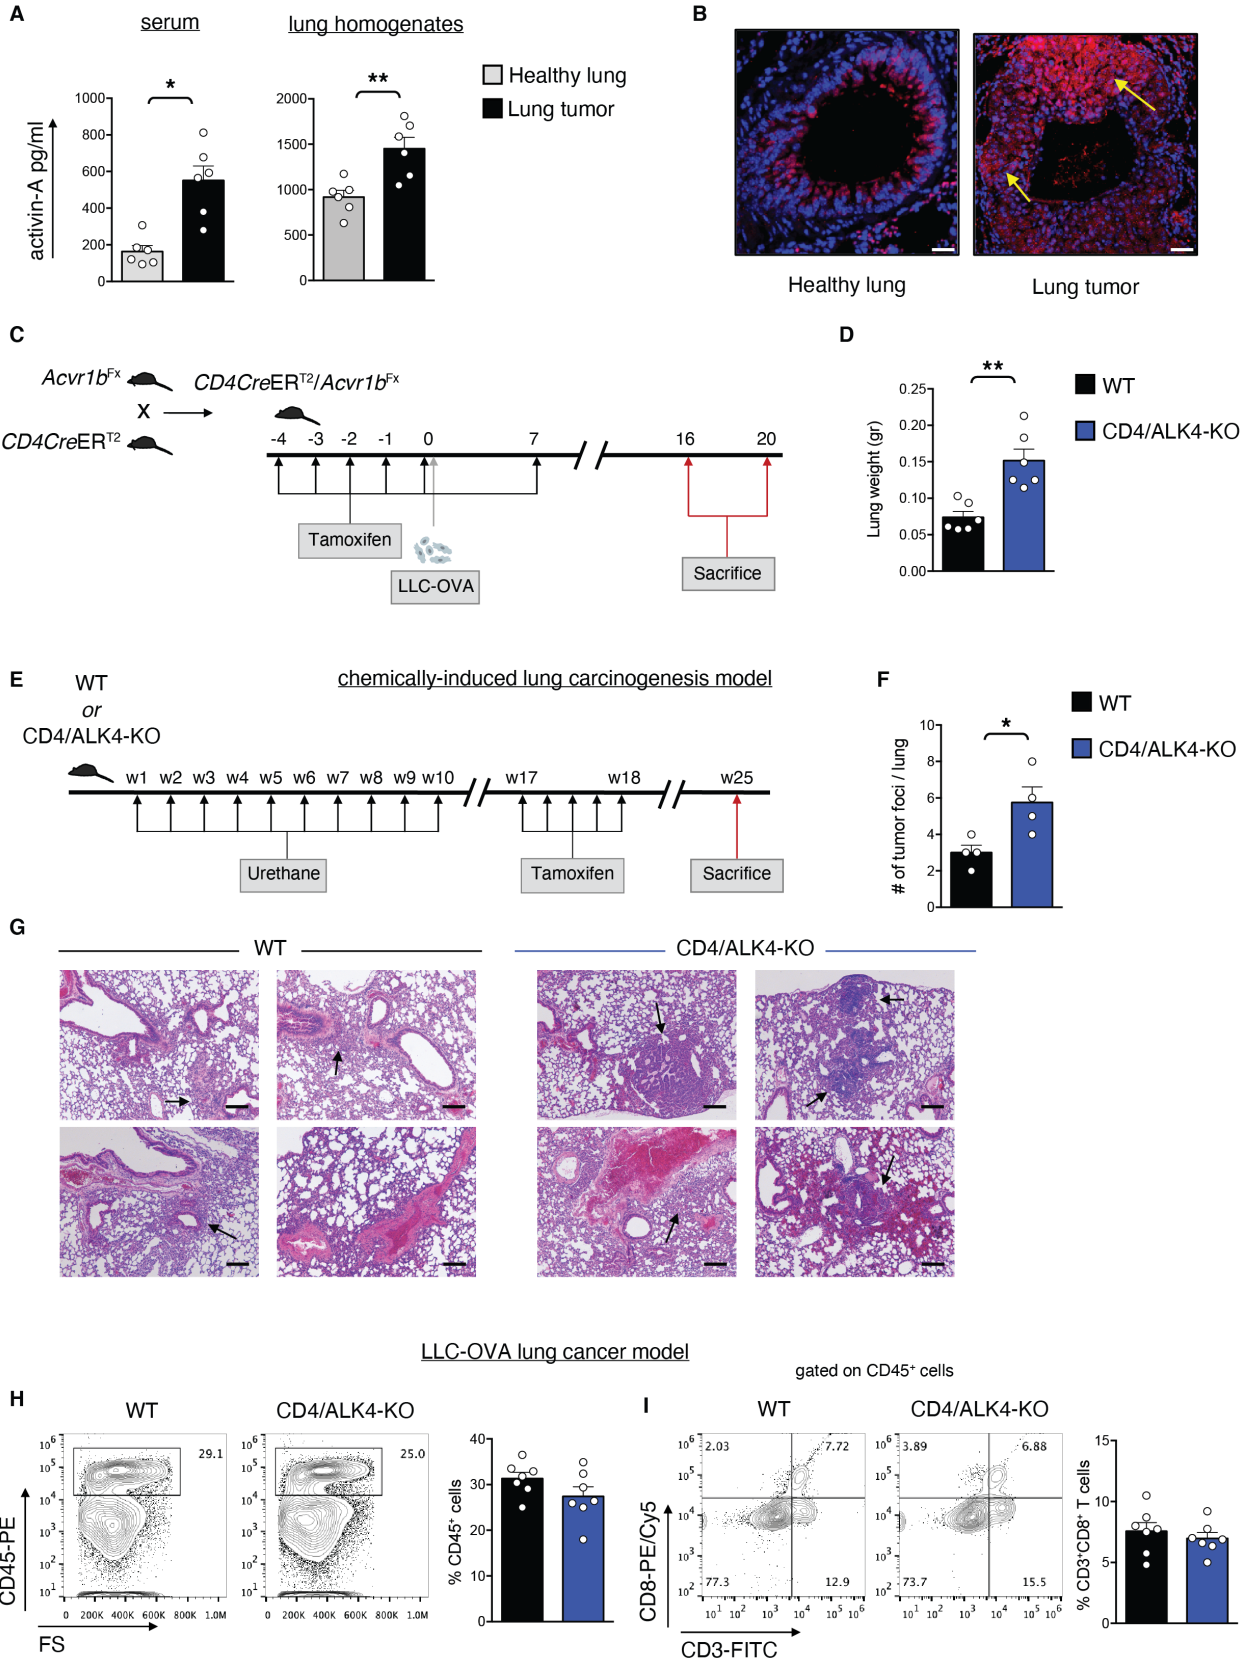

**Supplemental figure 3. Disruption of activin-A's signaling on CD4<sup>+</sup> T cells accelerates tumor progression in a chemically-induced model of lung cancer.**

(A) Activin-A levels in serum and lung homogenates from healthy and LLC tumor-bearing mice. Data are mean  $\pm$  SEM of triplicate wells and are representative of 6 independent experiments. (B) Representative confocal microscopy images of lung sections from healthy and LLC tumor-bearing mice stained with an antibody against activin-A (red). Nuclei are stained blue with DAPI (scale bars: 20 $\mu$ m). (C) Experimental protocol utilized. (D) Lung weight measurements of CD4/ALK4-KO and WT LLC-tumor bearing mice ( $n=6$ ). (E) Experimental protocol utilized. (F) Tumor foci measurements of CD4/ALK4-KO and WT lung-tumor bearing mice ( $n=4$ ). (G) Representative photomicrographs of H&E-stained lung sections (scale bars: 100 $\mu$ m). (H) Representative flow cytometry plots (left) and cumulative percentages of CD45<sup>+</sup> lung tumor infiltrating cells (right). Data are representative of 7 independent experiments. (I) Representative flow cytometry plots (left) and cumulative percentages of CD3<sup>+</sup>CD8<sup>+</sup> T cells among CD45<sup>+</sup> lung tumor infiltrating cells (right). Data are representative of 7 independent experiments. Statistical significance was obtained by unpaired Student's t-test; \*P < 0.05 and \*\*P < 0.01.

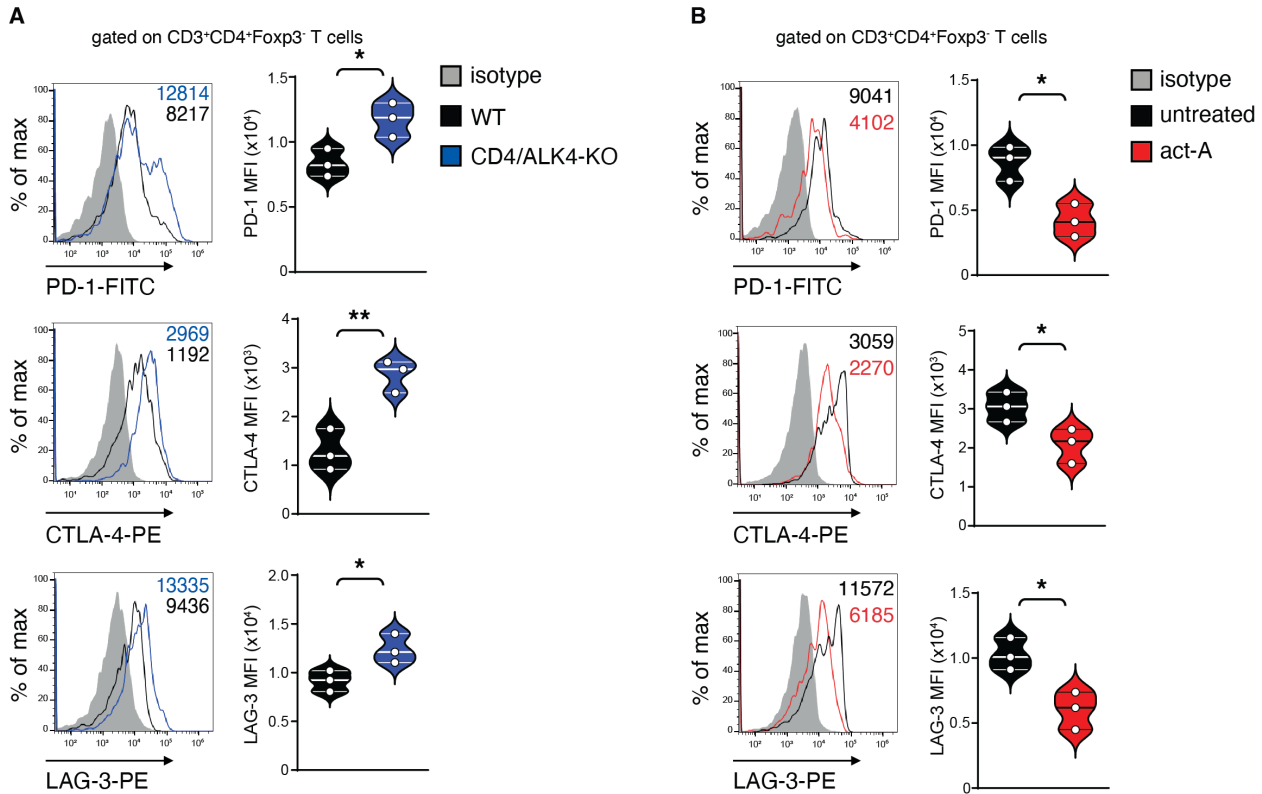

**Supplemental figure 4. Activin-A alters the expression of inhibitory receptors on lung tumor-infiltrating CD4<sup>+</sup> T cells.**

(A) Representative flow cytometry plots (left) and cumulative MFI values of PD-1, CTLA-4 or LAG-3 expression by CD3<sup>+</sup>CD4<sup>+</sup>Foxp3<sup>-</sup> T cells infiltrating lung tumors (right) from CD4/ALK4-KO or WT LLC-OVA-tumor bearing mice. (B) Representative flow cytometry plots (left) and cumulative MFI values of PD-1, CTLA-4 or LAG-3 expression by CD3<sup>+</sup>CD4<sup>+</sup>Foxp3<sup>-</sup> T cells infiltrating lung tumors (right) from activin-A-treated or untreated LLC-OVA-tumor bearing mice. Numbers in plots indicate MFI values. Shaded histograms represent isotype controls. Data are representative of 3 independent experiments. Statistical significance was obtained by unpaired Student's t-test; \*P < 0.05 and \*\*P < 0.01.

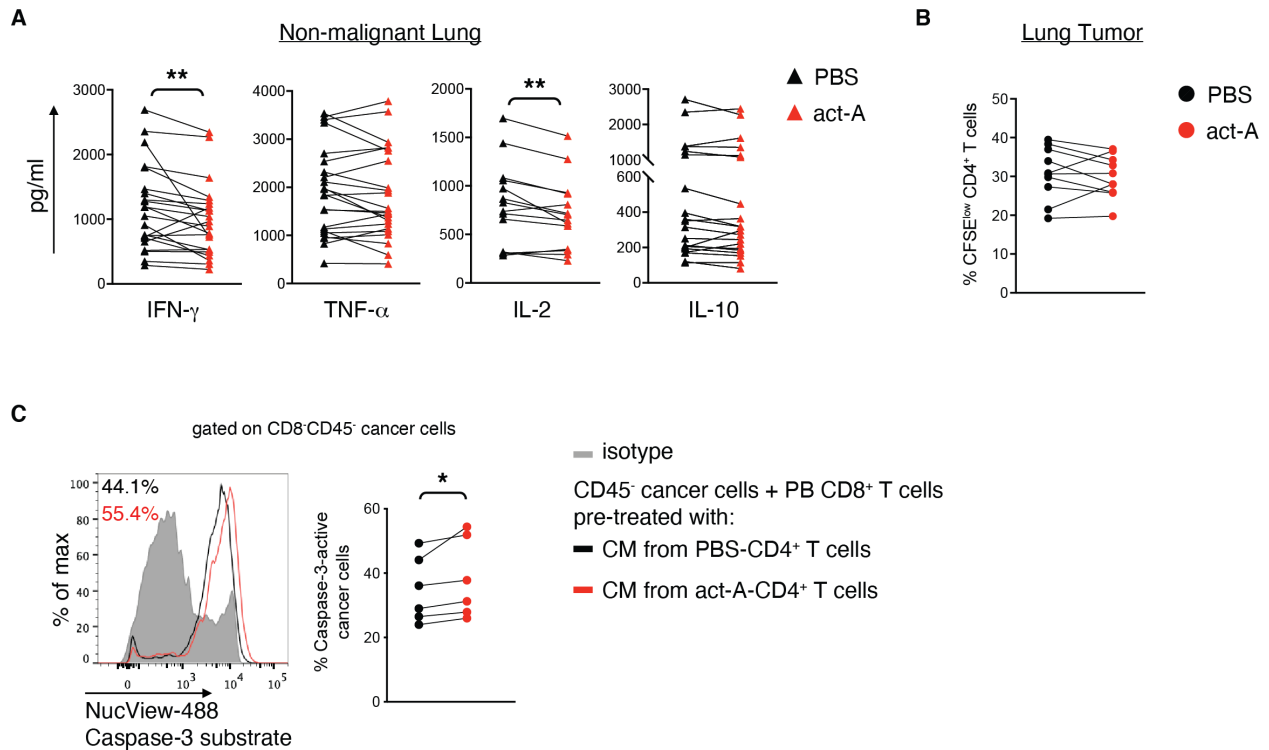

**Supplemental figure 5. Activin-A unveils different effects on T cells infiltrating lung tumors compared to adjacent healthy lung tissue.**

(A) Primary lung infiltrating leukocytes were isolated from, adjacent to tumors, non-malignant tissues from NSCLC patients and stimulated with antibodies against CD3/CD28 in the presence of activin-A or PBS. Cytokine levels in culture supernatants of activin-A- or PBS-treated non-malignant lung infiltrating leukocytes ( $n= 20-26$  donors). Data are mean  $\pm$  SEM of triplicate wells. (B) Activin-A- or PBS-treated human lung tumor infiltrating CD4<sup>+</sup> T cells were generated as in Fig. 6A and labelled with CellTrace-CFSE. Cumulative data of CD4<sup>+</sup> T cell proliferation, measured by flow cytometry are depicted ( $n= 10$  donors). (C) CD45<sup>-</sup> lung cancer cells were co-cultured with autologous PB CD8<sup>+</sup> T cells pre-treated with CM from act-A- or PBS-CD4<sup>+</sup> T cell cultures. Representative flow cytometry plot (left) and cumulative percentages (right) depicting caspase-3 activity of CD45<sup>-</sup> lung cancer cells ( $n=6$ ). Statistical significance was obtained by Wilcoxon matched-pairs signed rank test; \* $P < 0.05$  and \*\* $P < 0.01$ .



**A**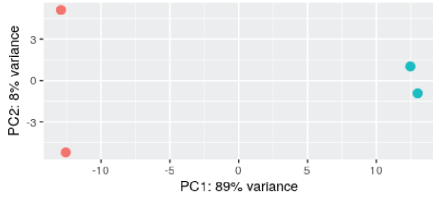

group  
 ● CD4/ALK4-KO (Tg)  
 ● WT

**B**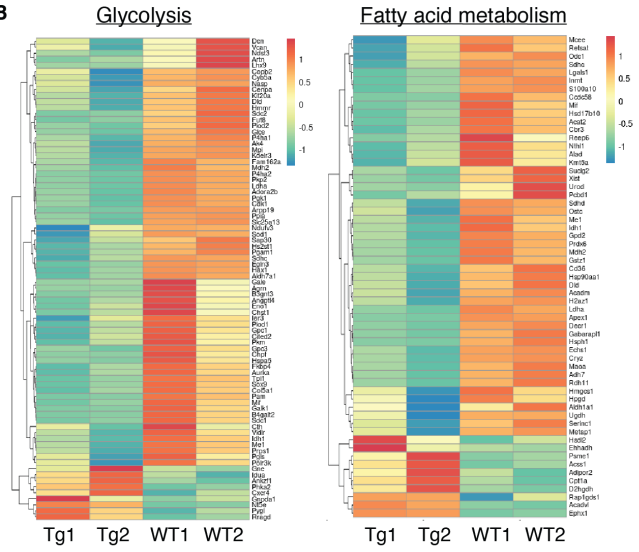**Oxidative phosphorylation**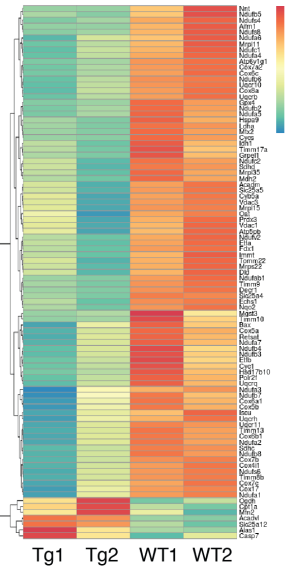**Glutathione metabolism**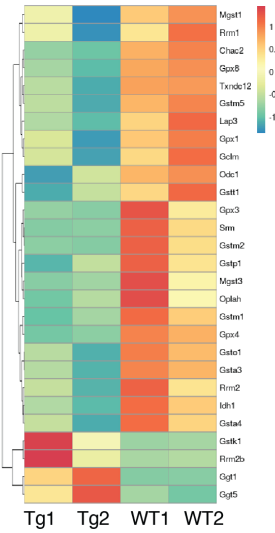**C mTOR pathway**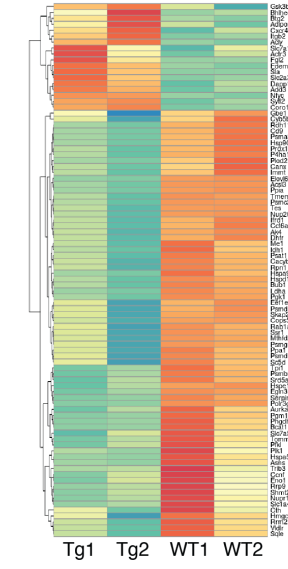**Myc targets**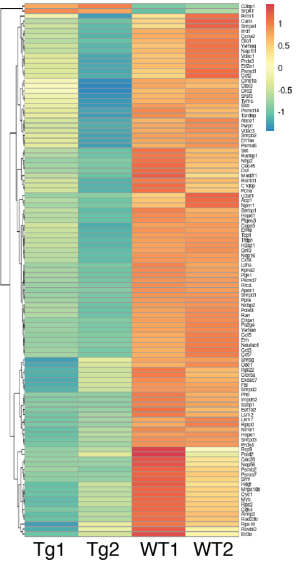**D**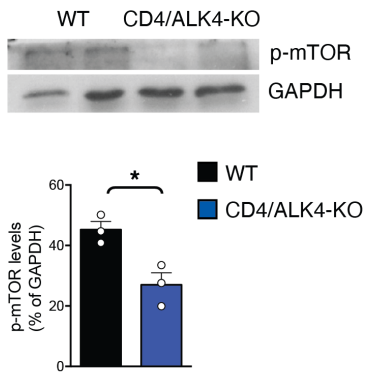**E**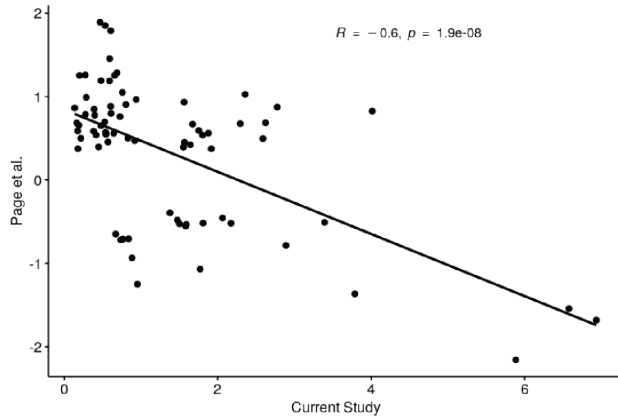

**Supplemental figure 6. Ablation of activin-A signaling imposes metabolic dysfunction on lung tumor infiltrating CD4<sup>+</sup> T cells.**

(A) Principle Component Analysis (PCA) for normalized gene counts in lung tumor infiltrating CD4<sup>+</sup> T cells (each dot represents an individual CD4<sup>+</sup> T cell sample derived from either CD4/ALK4-KO or WT mice). Counts were normalized to log<sub>2</sub> scale. (B) Heatmap depicting z-score differences among the analyzed samples regarding glycolysis, fatty-acid metabolism, oxidative phosphorylation, glutathione metabolism genes. (C) Heatmap depicting z-score differences among the analyzed samples regarding mTOR and Myc signaling pathways genes. (D) Representative immunoblots showing p-mTOR expression. Quantification of relative p-mTOR protein levels is depicted. Data are mean ± SEM and are representative of 3 independent experiments. (E) Correlation analysis regarding fold changes of Tox-regulated genes according to Page *et al.*, obtained from the respective publication and our RNA-Seq analysis. Applied is Pearson's correlation coefficient analysis. Statistical significance was obtained by unpaired Student's t-test; \*P < 0.05.

| <b>Supplemental table 1. NSCLC patient characteristics (n=38)</b> |                                         |           |
|-------------------------------------------------------------------|-----------------------------------------|-----------|
| <b>Age</b>                                                        | Mean                                    | 70.2      |
|                                                                   | Range                                   | 51-86     |
| <b>Gender (%)</b>                                                 | Female                                  | 11 (28.9) |
|                                                                   | Male                                    | 27 (71.1) |
| <b>Histology (%)</b>                                              | Adenocarcinoma                          | 21 (55.3) |
|                                                                   | Squamous cell carcinoma                 | 16 (42.1) |
|                                                                   | Other*                                  | 1 (2.6)   |
| <b>Smoking status (%)</b>                                         | Current                                 | 27 (71.1) |
|                                                                   | Former                                  | 5 (13.1)  |
|                                                                   | Never                                   | 6 (15.8)  |
| <b>TNM Stage (%)</b>                                              | IA (T1a/b/cN0M0)                        | 13 (34.2) |
|                                                                   | IB (T2aN0M0)                            | 12 (31.6) |
|                                                                   | IIA (T2bN0M0)                           | 3 (7.9)   |
|                                                                   | IIB (cT3N0M0, cT1N1M0)                  | 5 (13.15) |
|                                                                   | IIIA (T2bN2M0, T4N1M0, T4N0M0, T3cN1M0) | 5 (13.15) |
| <b>Concomitant Disease (%)</b>                                    | COPD**                                  | 11 (28.9) |
|                                                                   | Heart Disease                           | 16 (42.1) |
|                                                                   | Diabetes                                | 6 (15.8)  |
|                                                                   | None                                    | 12 (31.6) |

\*Other refers to Neuroendocrine tumors

\*\*Chronic Obstructive Pulmonary Disease
